# Supplementary figures and images for: SDN-ATK: a novel SDN-specific attack dataset
Source: PeerJ journal article supplement (doi:10.7717/peerj-cs.3556), 2026-02-10

(B) Random Forest Confusion Matrix

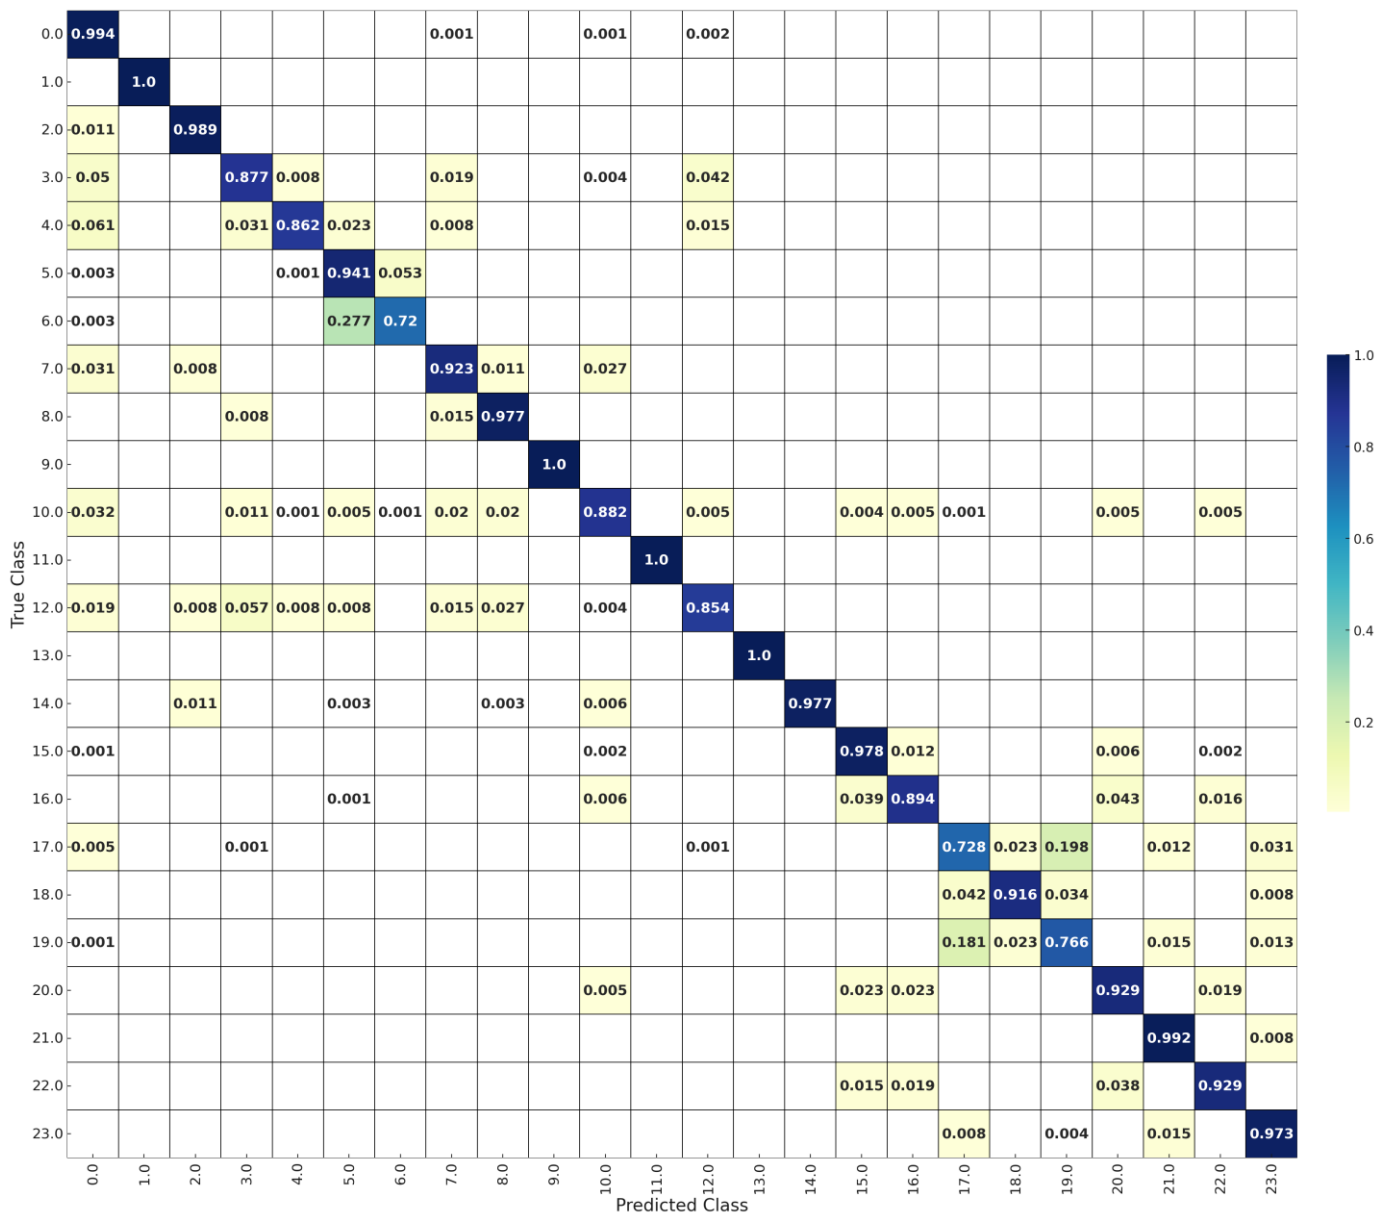

(C) Decision Tree Confusion Matrix

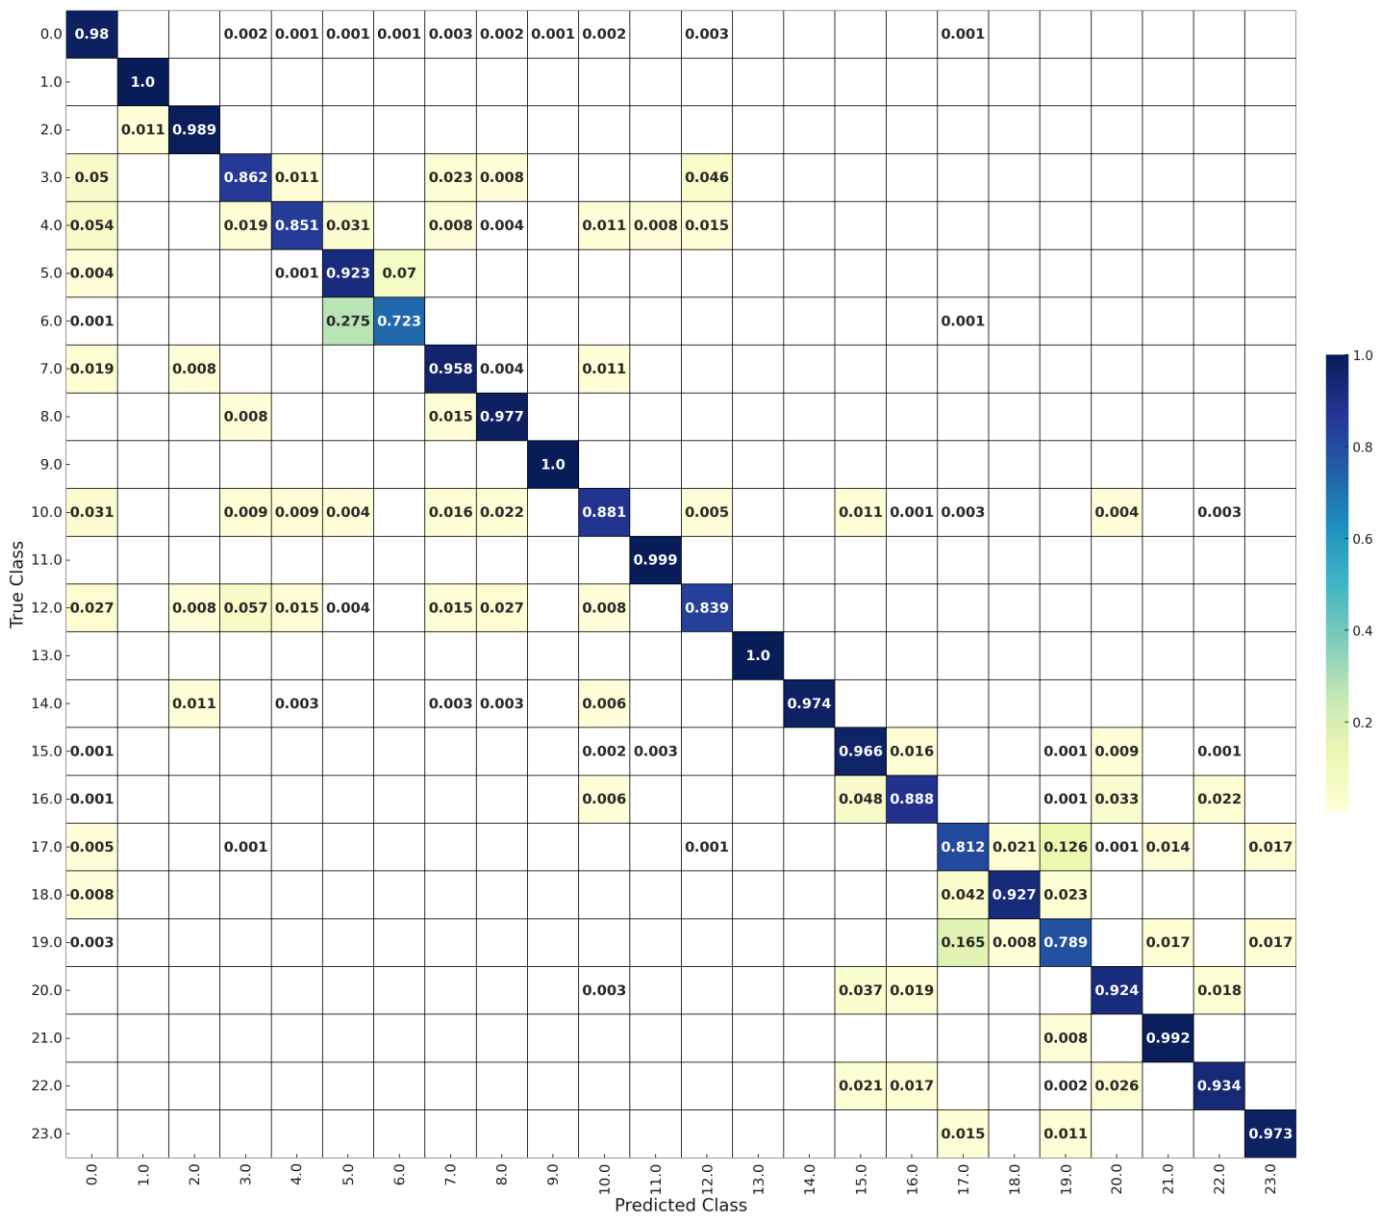

Supplement: Supplemental_Figures_S1.pdf [file Supplemental_Figures_S1.pdf]
